## RETRACTION

# Retraction: Antimicrobial activities of different solvent extracts from stem and seeds of *Peganum Harmala* L

The *PLOS ONE* Editors

The *PLOS ONE* Editors retract this article [1] because it was identified as one of a series of submissions for which we have concerns about authorship, competing interests, and peer review. We regret that the issues were not addressed prior to the article's publication.

AFN and SF did not agree with the retraction. MArif and XW responded but expressed neither agreement nor disagreement with the editorial decision. MSKK, SUK, SSaeed, AMK, RAK, MAfzal, MAZ, HOE, SShokralla, AA, and AG either did not respond directly or could not be reached.

## Reference

1. Arif M, Wang X, Kazi MSK, Ullah Khan S, Saeed S, Khan AM, et al. (2022) Antimicrobial activities of different solvent extracts from stem and seeds of *Peganum Harmala* L. *PLoS ONE* 17(4): e0265206. <https://doi.org/10.1371/journal.pone.0265206> PMID: 35482722

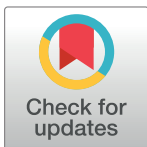

## OPEN ACCESS

**Citation:** The *PLOS ONE* Editors (2022) Retraction: Antimicrobial activities of different solvent extracts from stem and seeds of *Peganum Harmala* L. *PLoS ONE* 17(8): e0273538. <https://doi.org/10.1371/journal.pone.0273538>

**Published:** August 31, 2022

**Copyright:** © 2022 The *PLOS ONE* Editors. This is an open access article distributed under the terms of the [Creative Commons Attribution License](https://creativecommons.org/licenses/by/4.0/), which permits unrestricted use, distribution, and reproduction in any medium, provided the original author and source are credited.
